# Supplementary material for: Cationic and reactive primary amine-stabilised nanoparticles via RAFT aqueous dispersion polymerisation
Source: Royal Society of Chemistry journal article supplement (doi:10.1039/c5py01577d), 2015-11-02
Supplement: c5py01577d1.pdf [file c5py01577d1.pdf]

## Supporting Information

### Cationic and Reactive Primary Amine-Stabilised Nanoparticles via RAFT Aqueous Dispersion Polymerisation

M. Williams, N. J. W. Penfold, and S. P. Armes<sup>a</sup>

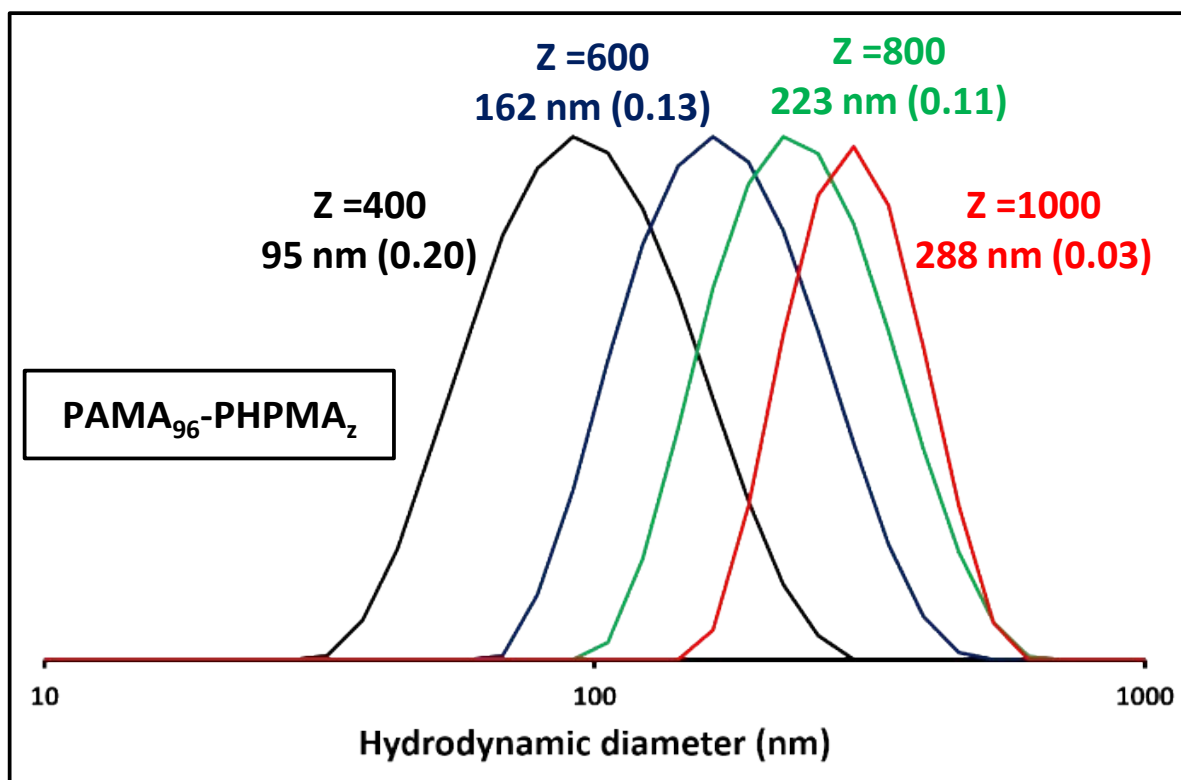

**Figure S1:** Hydrodynamic diameter, as measured by DLS, of a series of PAMA<sub>96</sub>-PPHMA<sub>z</sub> (z = 400 – 1000) diblock copolymer particles synthesised at 10 % w/w by RAFT aqueous dispersion polymerisation.

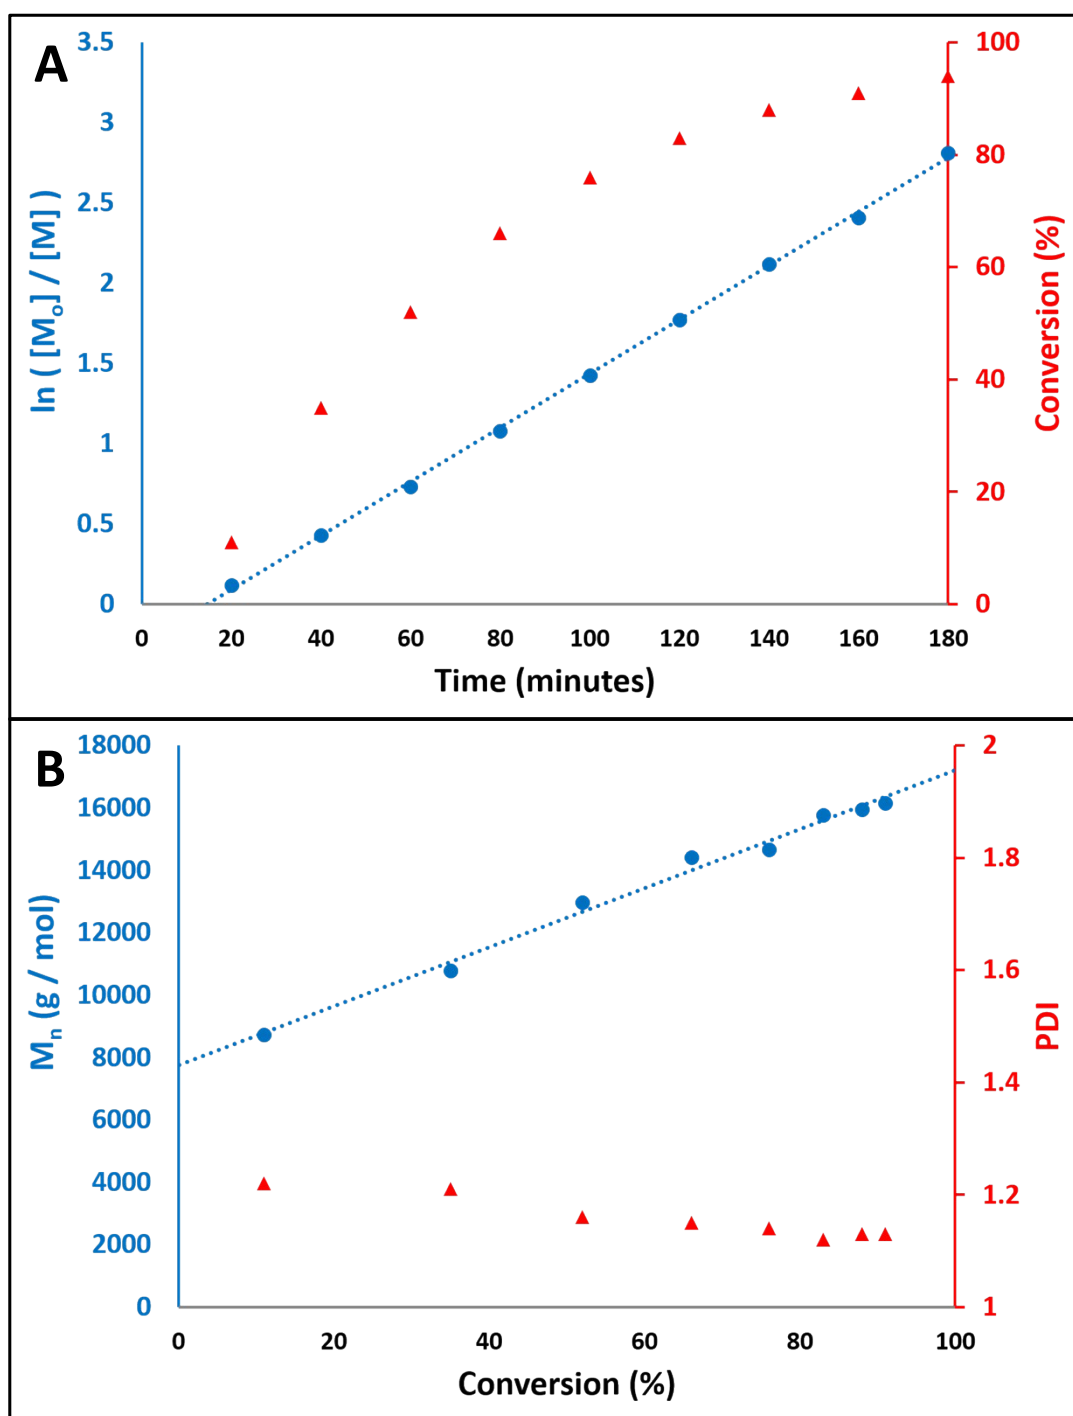

**Figure S2:** (A) Conversion vs time data derived from  $^1\text{H}$  NMR spectroscopy studies and (B) evolution of the number-average molecular weight and polydispersity ( $M_w/M_n$ ) with conversion of a RAFT solution polymerisation of glycerol monomethacrylate (GMA) at  $60^\circ\text{C}$  in water using MPETTC CTA and AIBA initiator at 30 % w/w with a CTA/initiator molar ratio = 5.

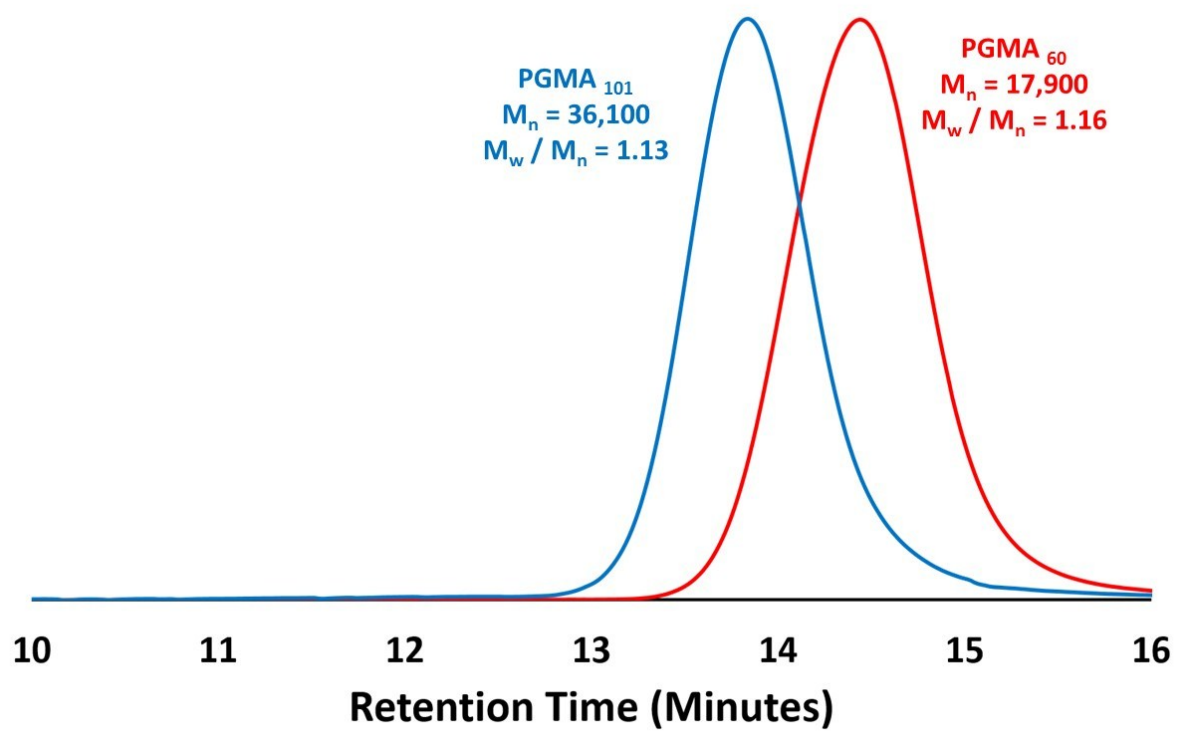

**Figure S3:** DMF gel permeation chromatograms obtained for a series of poly (glycerol monomethacrylate) (PGMA) macro-CTAs.

---

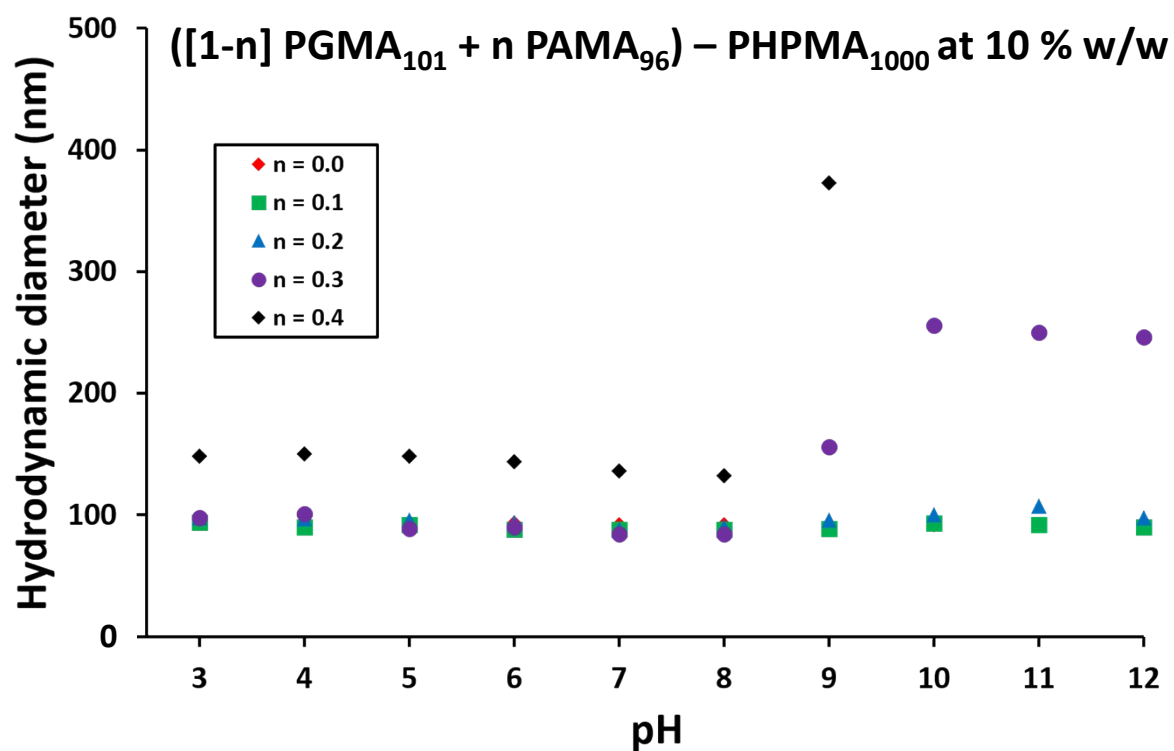

**Figure S4:** Hydrodynamic diameter vs pH for a series of diblock copolymer particles with the formula  $([1-n] \text{ PGMA}_{101} + n \text{ PAMA}_{96}) - \text{PHPMA}_{1000}$ . When  $n = 0.3$ , slight aggregation at pH 9 is seen. When  $n = 0.4$ , appreciable flocculation is detected.

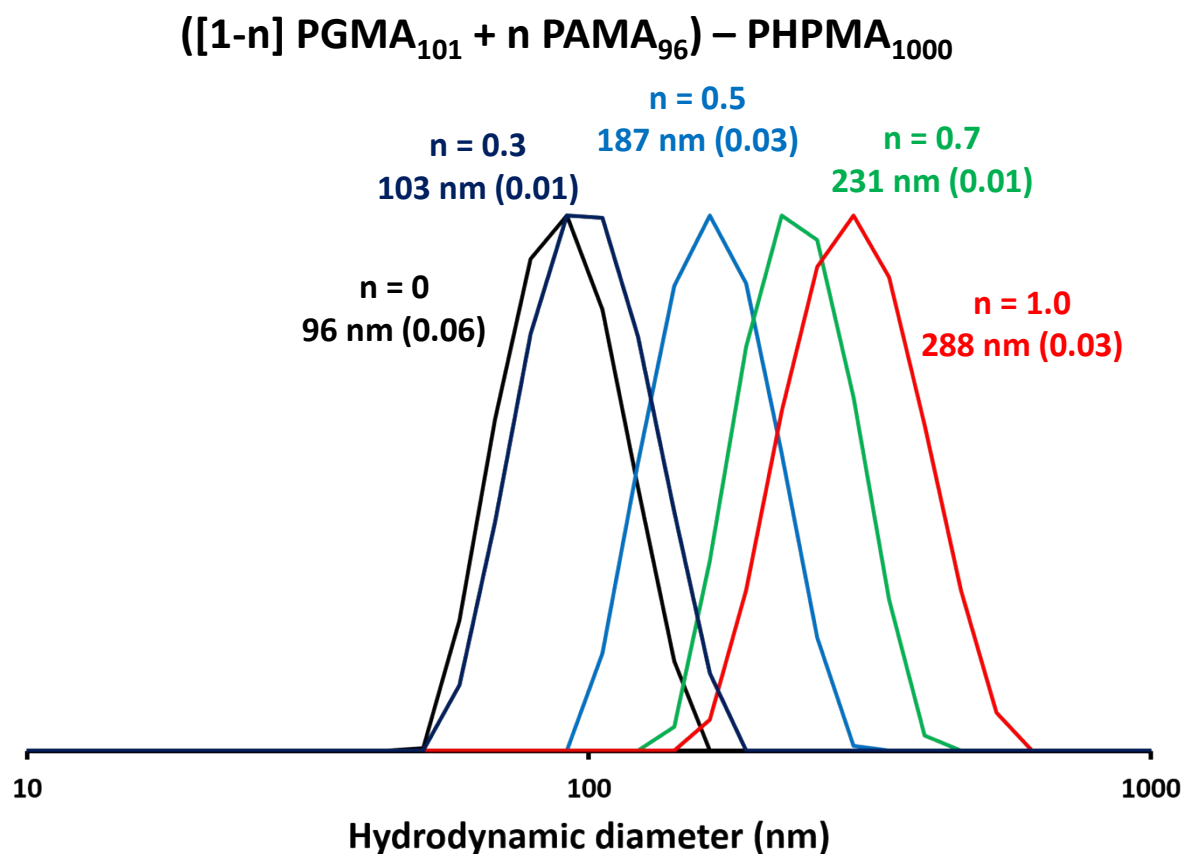

**Figure S5:** Hydrodynamic diameter, as measured by DLS, of a series  $([1-n] \text{ PGMA}_{101} + n \text{ PAMA}_{96}) - \text{PHPMA}_{1000}$  diblock copolymer particles synthesised at 10 % w/w by RAFT aqueous dispersion polymerisation.

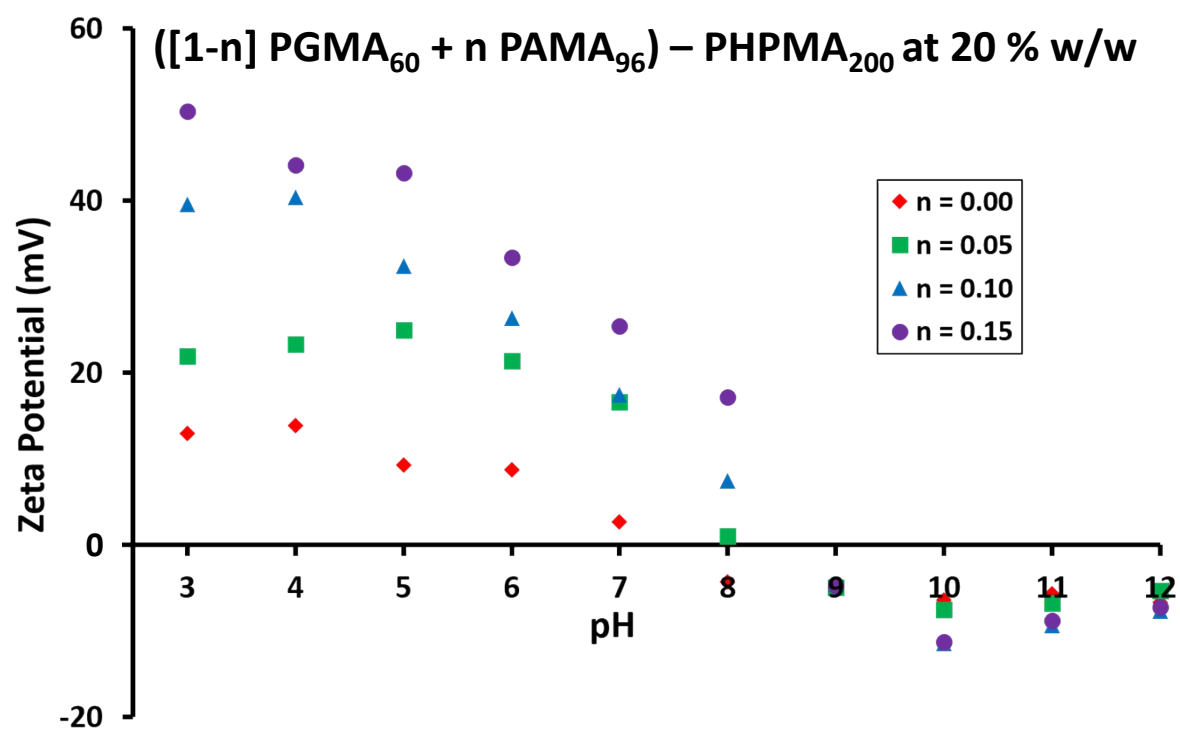

**Figure S6:** Zeta potential vs pH curves for diblock copolymer particles synthesised at 20 % w/w with the formula  $([1-n] \text{ PGMA}_{60} + n \text{ PAMA}_{96}) - \text{PHPMA}_{200}$  where  $n = 0 - 0.20$ .

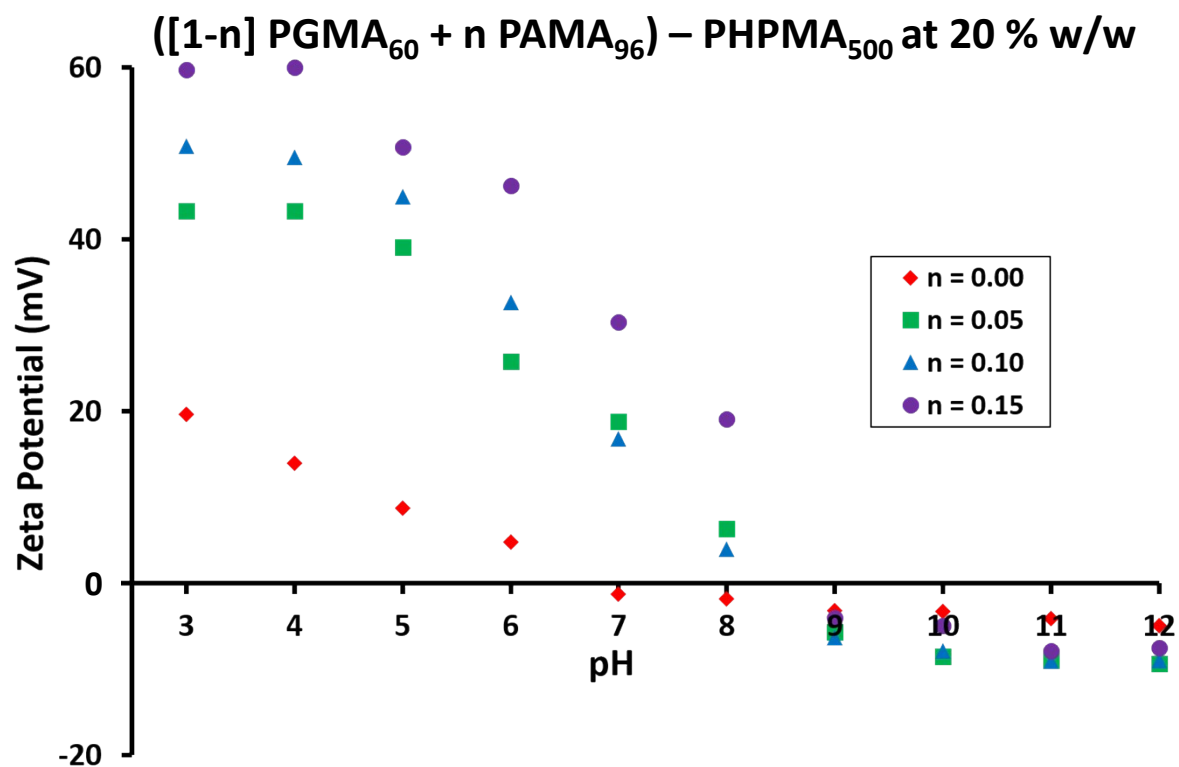

**Figure S7:** Zeta potential vs pH curves for diblock copolymer particles synthesised at 20 % w/w with the formula  $([1-n] \text{PGMA}_{60} + n \text{PAMA}_{96}) - \text{PHPMA}_{500}$  where  $n = 0 - 0.20$ .
